# Supplementary material for: Magnetic In–Pd catalysts for nitrate degradation
Source: Royal Society of Chemistry journal article supplement (doi:10.1039/d0en00069h), 2020-01-01
Supplement: d0en00069h1.pdf [file d0en00069h1.pdf]

## Electronic Supplementary Information (ESI)

### Magnetic In-Pd Catalysts for Nitrate Degradation

*Sujin Guo<sup>1,2</sup>, Camilah D. Powell<sup>2,3</sup>, Dino Villagran<sup>2,4</sup> and Michael S. Wong<sup>1,2,3,5,6\*</sup>*

<sup>1</sup>Department of Civil & Environmental Engineering, Rice University, 6100 Main Street, Houston, TX 77005, <sup>2</sup>Nanosystems Engineering Research Center for Nanotechnology-Enabled Water Treatment, <sup>3</sup>Department of Chemical and Biomolecular Engineering, Rice University, 6100 Main Street, Houston, TX 77005, <sup>4</sup>Department of Chemistry and Biochemistry, University of Texas at El Paso, El Paso, TX 79968, <sup>5</sup>Department of Chemistry, Rice University, 6100 Main Street, Houston, TX 77005, <sup>6</sup>Department of Materials Science and NanoEngineering, Rice University, 6100 Main Street, Houston, TX 77005

**\*To Whom Correspondence Should Be Addressed** E-mail: [mswong@rice.edu](mailto:mswong@rice.edu)

**Table S1 NEWT general test water (fresh) – for drinking water**

| <i>General Parameters</i>        | <i>Specification</i>                           |                           |
|----------------------------------|------------------------------------------------|---------------------------|
| Water Source                     | De-ionized water (conductivity < 1 $\mu$ S/cm) |                           |
| pH adjusted with HCl             | 7.5 $\pm$ 0.25                                 |                           |
| Temperature                      | 20 $\pm$ 2.5 $^{\circ}$ C                      |                           |
| <i>Constituents</i>              | <i>Concentration (mg/L)</i>                    | <i>Concentration (mM)</i> |
| Bicarbonate ( $\text{HCO}_3^-$ ) | 183                                            | 3.0                       |
| Chloride ( $\text{Cl}^-$ )       | 71                                             | 2.0                       |
| Sulfate ( $\text{SO}_4^{2-}$ )   | 48                                             | 0.50                      |
| Silicate ( $\text{SiO}_2^{2-}$ ) | 21.4                                           | 0.33                      |
| Nitrate ( $\text{NO}_3^-$ )      | 8.9 (2.0 as N)                                 | 0.14                      |
| Phosphate ( $\text{PO}_4^{3-}$ ) | 0.12 (0.04 as P)                               | 0.0013                    |
| Fluoride ( $\text{F}^-$ )        | 1.0                                            | 0.053                     |
| Calcium ( $\text{Ca}^{2+}$ )     | 40                                             | 1.0                       |
| Magnesium ( $\text{Mg}^{2+}$ )   | 12                                             | 0.50                      |
| Sodium ( $\text{Na}^+$ )         | 89                                             | 3.86                      |
| Total dissolved solids (TDS)     | 478                                            | -                         |
| Ionic strength                   | -                                              | 8.5                       |

**Table S2 Magnetic properties of  $\text{nFe}_3\text{O}_4$ ,  $\text{nFe}_3\text{O}_4@\text{SiO}_2$  and  $\text{Pd-In/nFe}_3\text{O}_4@\text{SiO}_2$** 

| <i>Compound</i>                             | <i>Magnetic Saturation Ms (emu/g)</i> | <i>Magnetic Remanence Mr (emu/g)</i> | <i>Magnetic Remanence/Magnetic Saturation</i> | <i>Coercivity (kOe)</i> |
|---------------------------------------------|---------------------------------------|--------------------------------------|-----------------------------------------------|-------------------------|
| $\text{nFe}_3\text{O}_4$                    | 77.1                                  | 7.0                                  | 0.091                                         | 0.06                    |
| $\text{nFe}_3\text{O}_4@\text{SiO}_2$       | 56.0                                  | 4.5                                  | 0.080                                         | 0.07                    |
| $\text{Pd-In/nFe}_3\text{O}_4@\text{SiO}_2$ | 29.5                                  | 2.5                                  | 0.085                                         | 0.18                    |

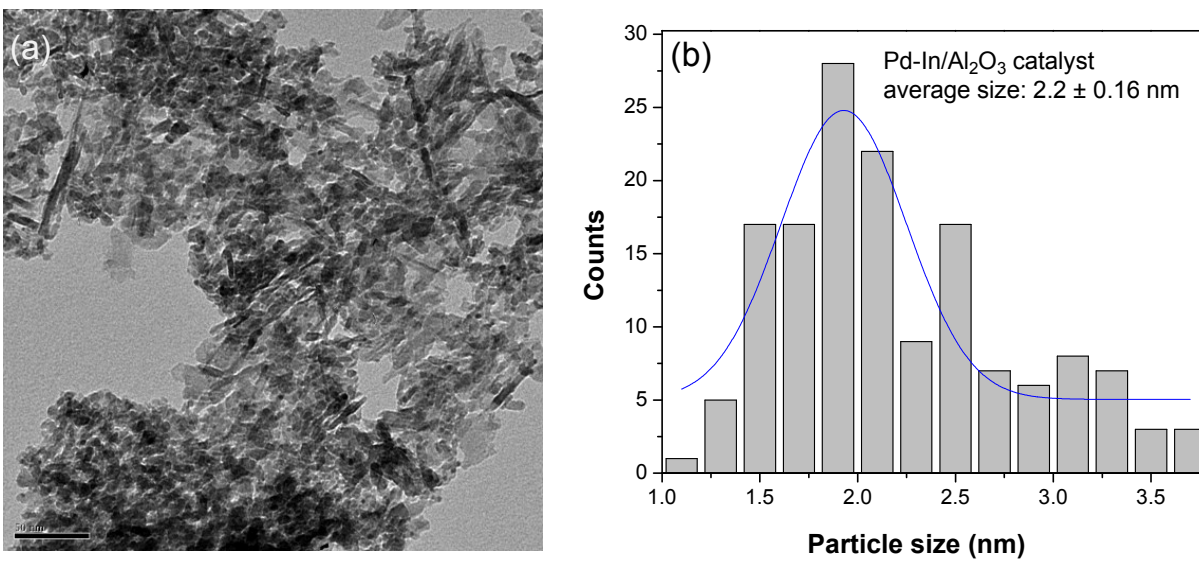

**Fig. S1** (a) TEM image of Pd-In/Al<sub>2</sub>O<sub>3</sub> catalyst (scale bar = 50 nm) and (b) Pd particle size distribution the Pd-In/Al<sub>2</sub>O<sub>3</sub> catalyst

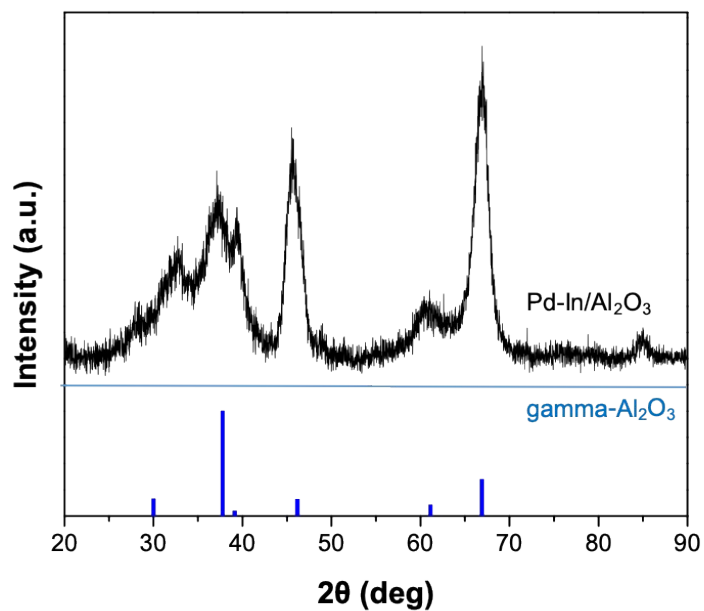

**Fig. S2** XRD spectrum of Pd-In/Al<sub>2</sub>O<sub>3</sub> sample.

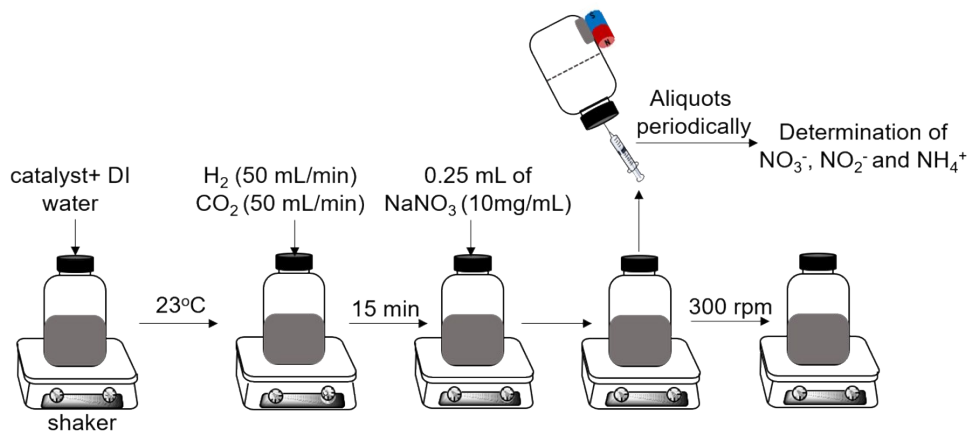

**Fig. S3 Schematic of the experimental setup**

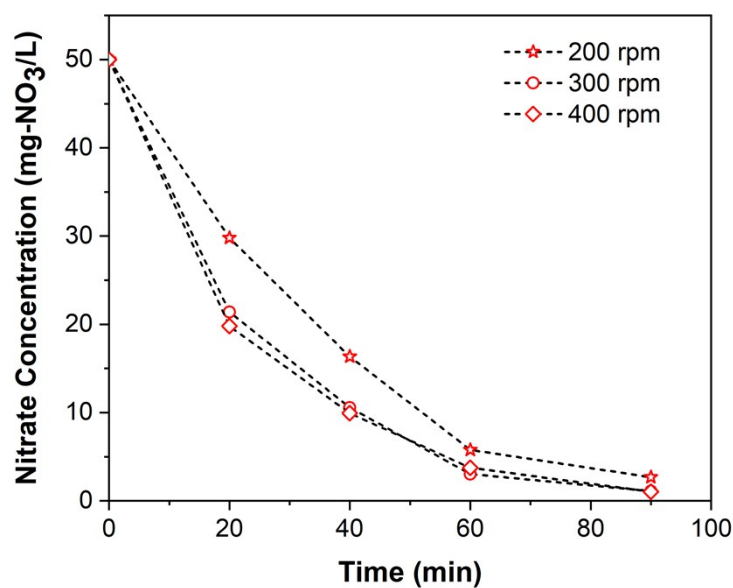

**Fig. S4** Changing shaking speed to check the external mass transfer. Reaction conditions: 1 g/L catalyst loading, 200, 300 and 400 rpm string rate, 1 atm pressure, DI water containing nitrate.

The Weisz–Prater parameter ( $C_{WP}$ ) was used to evaluate internal mass transfer limitations, as described in the following formula:

$$C_{WP} = \frac{R^2 k_{obs} \tau}{D\theta}$$

where  $k_{\text{obs}}$  is the observed pseudo-first-order rate constant for nitrate reduction ( $0.0616 \text{ s}^{-1}$ ) from Fig. 3,  $R$  is the catalyst's radius,  $\tau$  is the tortuosity factor of the catalyst (typically varies from 2 to 10),  $\theta$  is the porosity of the catalyst (typically varies from 0.2 to 0.7), and  $D$  is the diffusion coefficient of nitrate in water ( $1.7 \times 10^{-8} \text{ m}^2 \text{ s}^{-1}$ ). The reaction is significantly limited by internal mass transfer while  $C_{\text{WP}}$  is much greater than 1, while is negligible when  $C_{\text{WP}}$  is much less than 1. If we choose the smallest  $\theta$  value (0.2), largest  $\tau$  value (10) and  $R$  value ( $1 \mu\text{m}$ ) to estimate the maximum value of  $C_{\text{WP}}$ . The calculated maximum  $C_{\text{WP}}$  was  $3.6 \times 10^{-6}$ , much less than 1. Thus, internal mass transfer limitations are also negligible for our Pd-In/ $\text{Fe}_3\text{O}_4$  catalyst in the nitrate reduction. For the  $\text{SiO}_2$  coated catalyst, the surface radius is supposed to be larger than Pd-In/ $\text{Fe}_3\text{O}_4$  and  $\theta$  will be smaller, while the estimated  $C_{\text{WP}}$  was still smaller than 1.

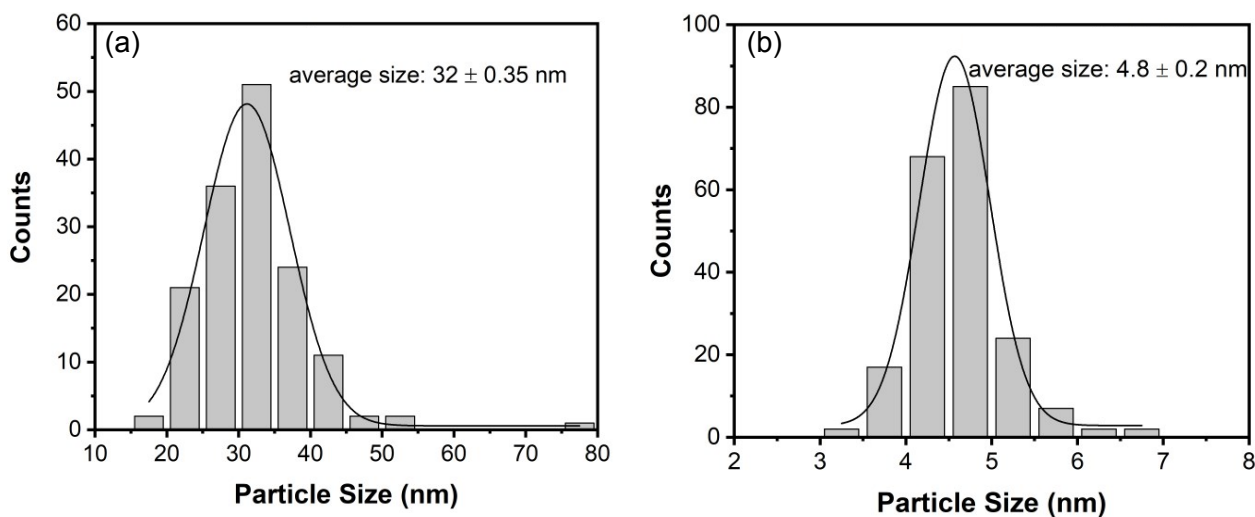

**Fig. S5** Particle size distribution of (a) nFe<sub>3</sub>O<sub>4</sub> and (b) Pd-In NPs of Pd-In/nFe<sub>3</sub>O<sub>4</sub>@SiO<sub>2</sub> catalyst material.

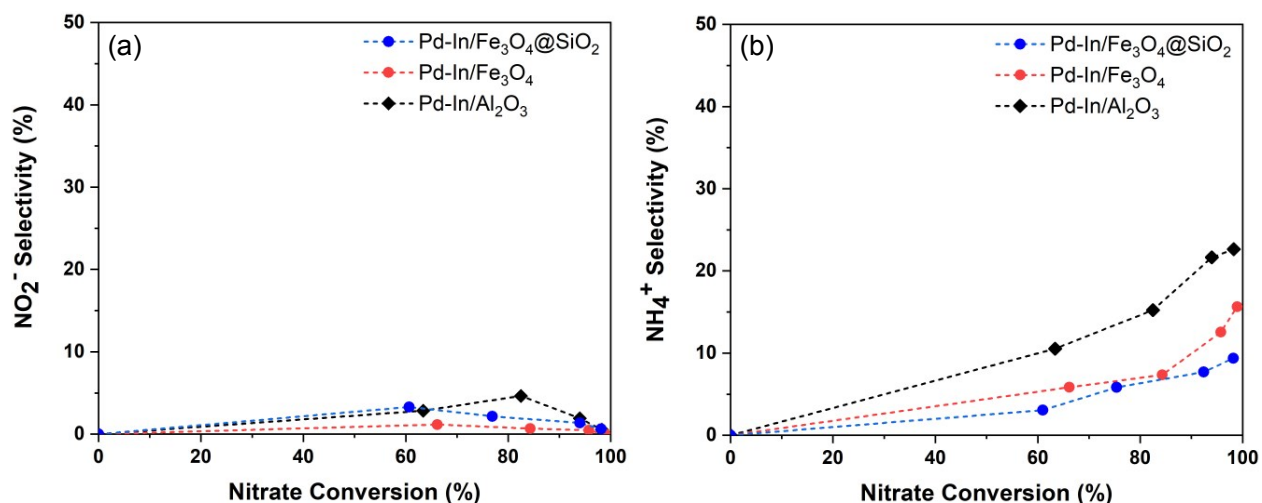

**Fig. S6** Selectivity of the Pd-In/nFe<sub>3</sub>O<sub>4</sub>@SiO<sub>2</sub>, Pd-In/nFe<sub>3</sub>O<sub>4</sub> and Pd-In/Al<sub>2</sub>O<sub>3</sub> catalysts to nitrite and ammonium as a function of nitrate conversion in DI water. (a) S NO<sub>2</sub><sup>-</sup>, (b) S NH<sub>4</sub><sup>+</sup>. Reaction conditions: 1 g/L catalyst loading, 300 rpm string rate, 1 atm pressure, DI water containing nitrate.

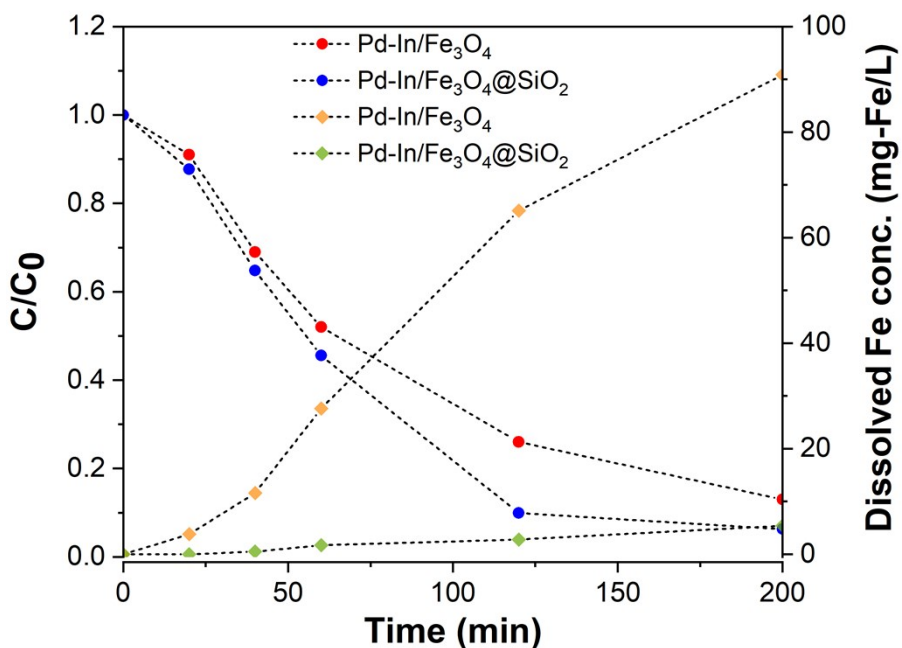

**Fig. S7** Nitrate reduction kinetics in SDW for Pd-In/nFe<sub>3</sub>O<sub>4</sub> (red) and Pd-In/nFe<sub>3</sub>O<sub>4</sub>@SiO<sub>2</sub> (blue), and the corresponding iron leaching concentration during the first cycle. Reaction conditions: 1 g/L catalyst loading, 300 rpm string rate, 1 atm pressure, SDW containing nitrate (~50 ppm).

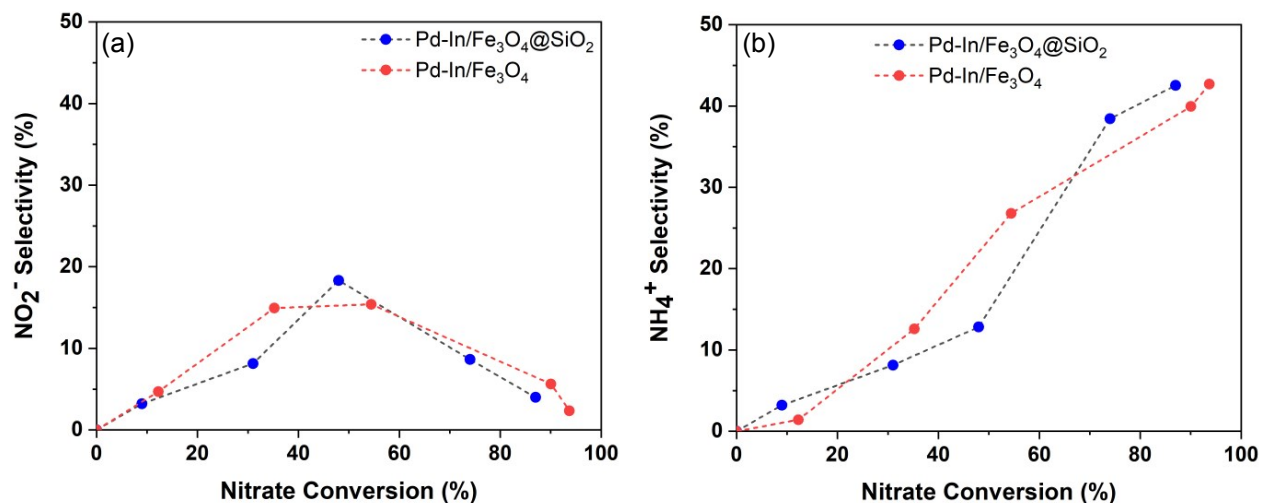

**Fig. S8** Selectivity of the Pd-In/nFe<sub>3</sub>O<sub>4</sub>@SiO<sub>2</sub> and Pd-In/nFe<sub>3</sub>O<sub>4</sub> catalysts to nitrite and ammonium as a function of nitrate conversion in SDW. (a) S NO<sub>2</sub><sup>-</sup>, (b) S NH<sub>4</sub><sup>+</sup>. Reaction conditions: 1 g/L catalyst loading, 300 rpm string rate, 1 atm pressure, DI water containing nitrate.
